# Supplementary material for: Anomalous thermal transition and crystallization of ionic liquids confined in graphene multilayers
Source: Royal Society of Chemistry journal article supplement (doi:10.1039/c2cc16367e), 2011-12-13
Supplement: c2cc16367e.pdf [file c2cc16367e.pdf]

Supplementary Material (ESI) for Chemical Communications  
Electronic Supporting Information for the article:

**Anomalous thermal transition and crystallization of ionic  
liquids confined in graphene multilayers\*\***

**Jinkyu Im,<sup>a</sup> Sung Dae Cho,<sup>b</sup> Min Hye Kim,<sup>b</sup> Young Mee Jung,<sup>c</sup> Hoon Sik Kim<sup>\*a</sup>  
and Ho Seok Park<sup>\*b</sup>**

5

10

15

20

25

30

### Confinement of ionic liquids in the graphene multilayers

Graphene oxides (GOs) were synthesized through the acidification, oxidation, and exfoliation of natural graphite through modified Hummers method.<sup>1</sup> The resultant GOs (5mg) were fully exfoliated and dissolved in deionized (DI) water (10 mL). The GOs were reduced into reduced graphene oxide (RGO) by 10  $\mu$ L of hydrazine solution at 95 °C for 12 hours. The quality of RGO was confirmed in our previous reports.<sup>2</sup> The graphene multilayers (GMLs) were obtained from the filtering of homogeneous RGO solution in N,N-dimethylformamide (DMF) through anodic alumina oxide (AAO) membrane filter (47 mm in diameter, 0.2  $\mu$ m pore size, Whatman). The GML powders were dried in air and isolated from the filter membrane.

The GMLs (2 mg) were mixed with 1-butyl-3-methylimidazolium tetrafluoroborate ([bmim][BF<sub>4</sub>], 0.4 mL), and the mixture was ground with an agate mortar for 20 min. [bmim][BF<sub>4</sub>] was confined in the GMLs and crystallized through  $\pi$ - $\pi$  stacking and hydrogen bonding interactions in the course of grinding. The resultant suspension gradually turned into a black paste. [bmim][BF<sub>4</sub>]@GML was isolated from the bulk [bmim][BF<sub>4</sub>], not confined in GMLs, through the centrifugation (18,000 rpm, 60 min). [bmim][BF<sub>4</sub>]@GML was finally collected by removing the supernatant with a pipet. [bmim][PF<sub>6</sub>]@GML and [bmim][Tf<sub>2</sub>N]@GML were synthesized, following the same procedure of [bmim][BF<sub>4</sub>]@GML.

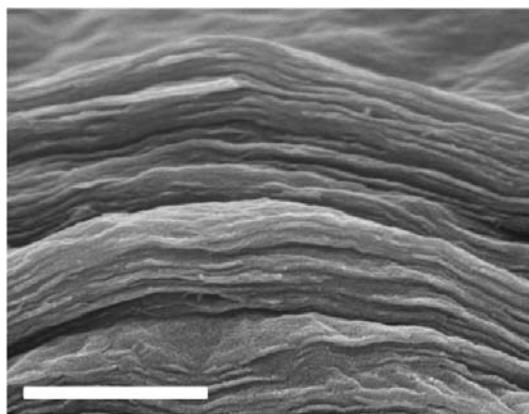

**Fig. S1.** Cross-sectional SEM image of GML (500 nm bar).

5

10

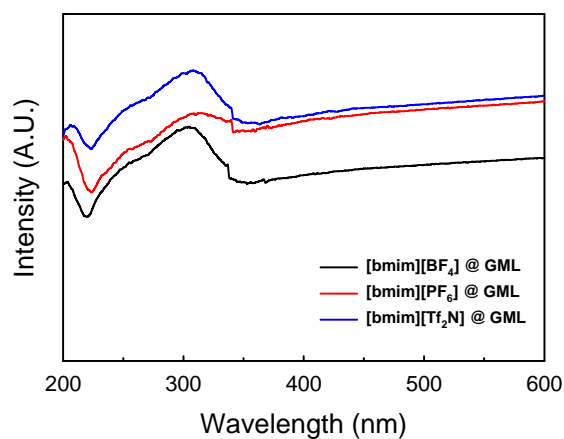

**Fig. S2.** UV-vis spectra of [bmim][BF<sub>4</sub>]@GML, [bmim][PF<sub>6</sub>]@GML, and [bmim][Tf<sub>2</sub>N]@GML.

UV spectra of the three RTILs@GMLs showed different locations of a characteristic band of GML at around 230 nm, which is ascribed to the  $\pi$ - $\pi^*$  transition.<sup>3</sup>

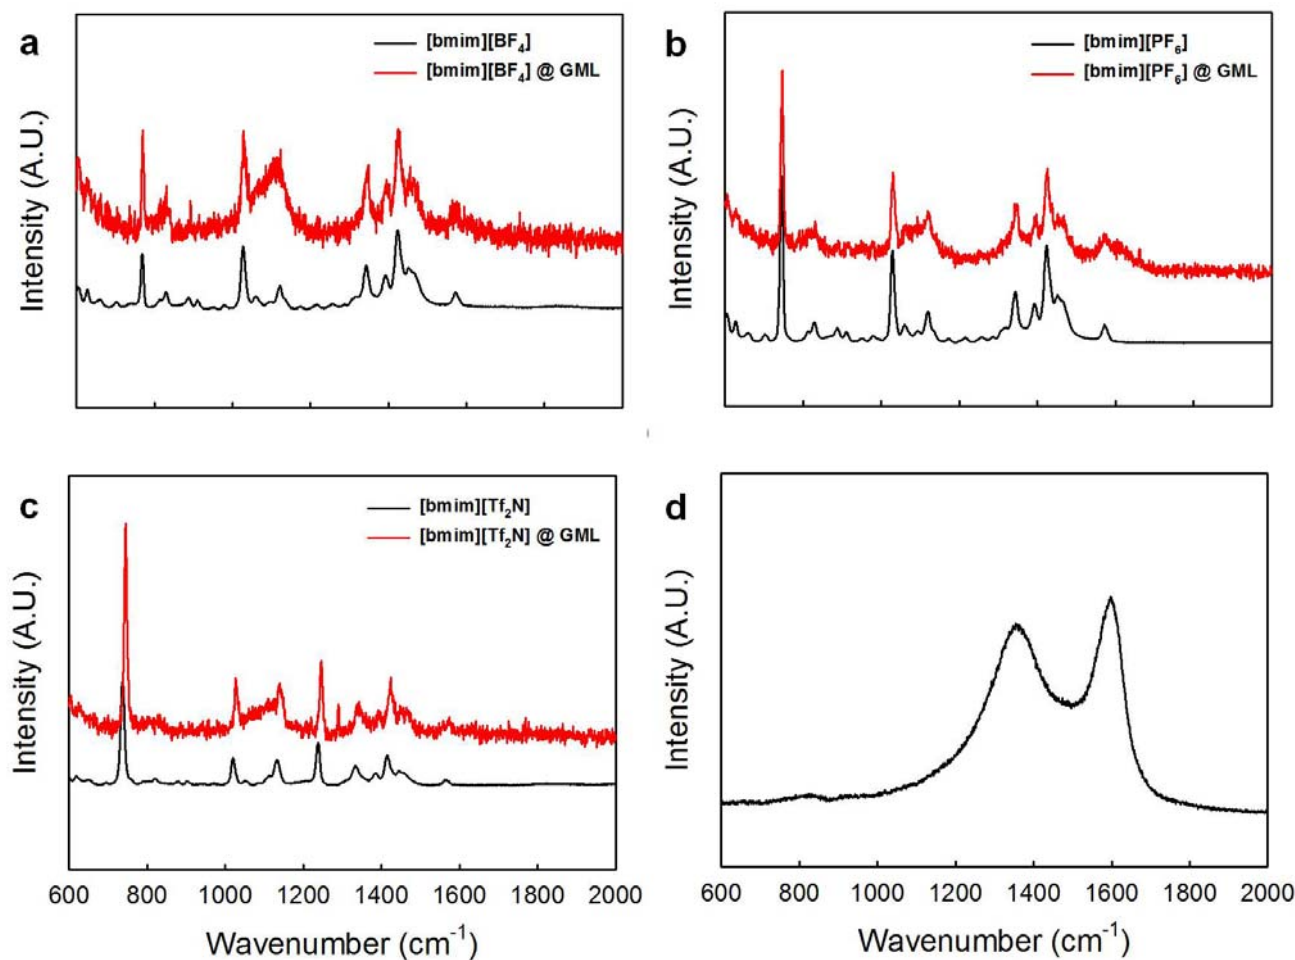

**Fig. S3.** Raman spectra of (a) [bmim][BF<sub>4</sub>] and [bmim][BF<sub>4</sub>]@GML, (b) [bmim][PF<sub>6</sub>] and [bmim][PF<sub>6</sub>]@GML, (c) [bmim][Tf<sub>2</sub>N] and [bmim][Tf<sub>2</sub>N]@GML, and (d) GML.

As shown in the Raman spectra of GML, three RTILs, and three RTILs @ GMLs, the characteristic bands of pristine GML and RTILs well matched with previous literature.<sup>4</sup> In a similar manner to FT-IR and XRD spectra of the three RTILs@GML, however, the characteristic bands of GMLs in the RTILs@GMLs were not observed due to small volume fraction relative to RTILs.<sup>4</sup> The bulk RTILs revealed C–C and C–N stretching vibrations of the imidazolium ring at around 1570 cm<sup>-1</sup>, out-plane vibration of imidazolium ring at around 1460 cm<sup>-1</sup>, symmetrical deformation vibrations of alkyl chain at around 1420 cm<sup>-1</sup>, and in-plane wagging vibrations of alkyl chain at around 1020 cm<sup>-1</sup>.<sup>4</sup> In contrast,

the vibrational bands of anions are assigned in the 770 – 740 cm<sup>-1</sup> region due to the expansion and contraction of the respective anions.<sup>5</sup> The characteristic bands of imidazolium rings and anions at around 1570 cm<sup>-1</sup>, 1460 cm<sup>-1</sup>, and 770 – 740 cm<sup>-1</sup> were shifted to higher wavenumbers after the confinement in the layers of GMLs through  $\pi$ - $\pi$  stacking interactions with the conjugated structures of GMLs and different hydrogen bonding interactions of respective anions.

10

15 Ref.

1. W. S. Hummers and R. E. Offeman, *J. Am. Chem. Soc.*, 1958, **80**, 1339.
2. B. G. Choi, W. H. Hong, Y. M. Jung and H. S. Park, *Chem. Commun.*, 2011, **47**, 10293; B. G. Choi, J. Hong, W. H. Hong, P. T. Hammond and H. S. Park, *ACS Nano*, 2011, **5**, 7205; B. G. Choi, H. S. Park, T. J. Park, M. H. Yang, J. S. Kim, S. Y. Jang, N. S. Heo, S. Y. Lee, K. Kong and W. H. Hong,  
20 *ACS Nano*, 2010, **4**, 2910.
3. B. G. Choi, W. H. Hong, Y. M. Jung and H. S. Park, *Chem. Commun.*, 2011, **47**, 10293.
4. F. Shi and Y. Deng, *Spectrochim. Acta Part A*, 2005, **62**, 239.
5. M. Herstedt, M. Smirnov, P. Johansson, M. Chami, J. Grondin, L. Servant and J. C. Lassègues, *J. Raman Spectrosc.*, 2005, **36**, 762.
